# Supplementary material for: Forensic analysis of hand-written documents using laser-induced breakdown spectroscopy (LIBS) and chemometrics
Source: Royal Society of Chemistry journal article supplement (doi:10.1039/d0ay02089c), 2020-12-08
Supplement: d0ay02089c1.pdf [file d0ay02089c1.pdf]

Supporting information

# Forensic analysis of hand-written documents using laser-induced breakdown spectroscopy (LIBS) and chemometrics

Felipe Ferri Hilario, Matheus Lima de Mello, Edenir Rodrigues Pereira-Filho\*

Group of Applied Instrumental Analysis, Department of Chemistry, Federal University of São Carlos, São Carlos, São Paulo State, 13565-905, Brazil

\*Corresponding author: [erpf@ufscar.br](mailto:erpf@ufscar.br)

**Table S1.** Results obtained from design s2.

| Experimental run | Average Score Values |           |          | Difference between the average score values |            |             | Normalized difference |                 |                  | Dg   |
|------------------|----------------------|-----------|----------|---------------------------------------------|------------|-------------|-----------------------|-----------------|------------------|------|
|                  | Paper                | Black Pen | Blue Pen | Blue-black                                  | Blue-paper | Black-paper | Blue-black (d1)       | Blue-paper (d2) | Black-paper (d3) |      |
| 1                | -2982                | 8239      | 5060     | 3179                                        | 8042       | 1121        | 0.55                  | 1.00            | 1.00             | 0.82 |
| 2                | -941                 | 4556      | -489     | 5045                                        | 451        | 5496        | 0.94                  | 0.00            | 0.43             | 0.00 |
| 3                | -667                 | 2821      | -193     | 3014                                        | 474        | 3488        | 0.52                  | 0.00            | 0.23             | 0.07 |
| 4                | -2586                | 6133      | 4456     | 1677                                        | 7042       | 8719        | 0.24                  | 0.87            | 0.75             | 0.54 |
| 5                | 894                  | -5410     | -1932    | 3480                                        | 2826       | 6306        | 0.61                  | 0.31            | 0.51             | 0.46 |
| 6                | -1412                | 4116      | 3602     | 514                                         | 5014       | 5528        | 0.00                  | 0.60            | 0.43             | 0.00 |
| 7                | -712                 | -1886     | 1241     | 3127                                        | 1953       | 1174        | 0.54                  | 0.20            | 0.00             | 0.00 |
| 8                | -742                 | 2217      | 2865     | 648                                         | 3607       | 2959        | 0.03                  | 0.42            | 0.18             | 0.13 |
| 9                | 1637                 | -9112     | -3759    | 5352                                        | 5396       | 10748       | 1.00                  | 0.65            | 0.95             | 0.85 |
| 10               | 1842                 | -8639     | -4456    | 4183                                        | 6297       | 10481       | 0.76                  | 0.77            | 0.93             | 0.81 |
| 11               | -2135                | 6850      | 2830     | 4020                                        | 4966       | 8985        | 0.72                  | 0.59            | 0.78             | 0.69 |
| 12               | -1222                | 4838      | 3495     | 1342                                        | 4718       | 5525        | 0.17                  | 0.56            | 0.49             | 0.36 |
| 13               | 2606                 | -2709     | -4774    | 2065                                        | 7380       | 5315        | 0.32                  | 0.91            | 0.41             | 0.49 |
| 14               | -1503                | 3855      | 5465     | 1611                                        | 6968       | 6950        | 0.23                  | 0.86            | 0.42             | 0.43 |
| 15               | 47                   | 5249      | 3790     | 1459                                        | 3744       | 5492        | 0.20                  | 0.43            | 0.40             | 0.32 |
| 16               | 2779                 | -5352     | -3201    | 2151                                        | 5981       | 8473        | 0.34                  | 0.73            | 0.69             | 0.55 |
| 17               | 1107                 | -6159     | -1292    | 4868                                        | 2399       | 6814        | 0.90                  | 0.26            | 0.61             | 0.52 |

**Table S2.** Analysis of variance obtained for the regression model of Design 2.

| Variation Source   | Square Some | Degrees of freedom | Square Media | F test | Tabled F value |
|--------------------|-------------|--------------------|--------------|--------|----------------|
| Regression         | 1.157       | 5                  | 0.231        | 11.55  | 3.20           |
| Residue            | 0.220       | 11                 | 0.020        |        |                |
| Total              | 1.377       | 16                 | 0.086        |        |                |
| Pure Error         | 0.014       | 2                  | 0.007        |        |                |
| Lack of Fit        | 0.207       | 9                  | 0.023        | 3.35   | 19.38          |
| R <sup>2</sup>     | 0.84        | R                  | 0.9165       |        |                |
| R <sup>2</sup> max | 0.990       | Rmax               | 0.995        |        |                |

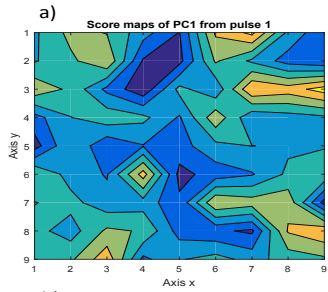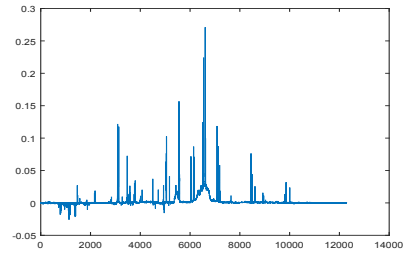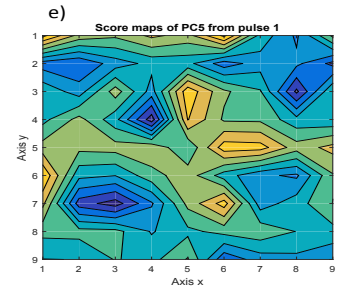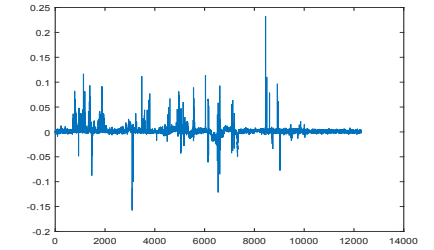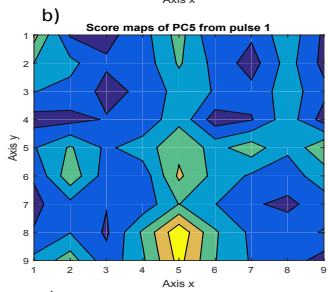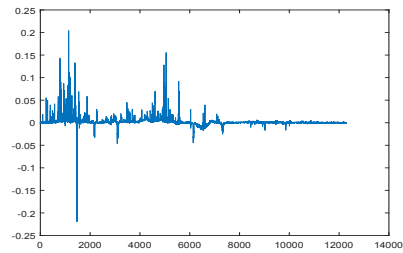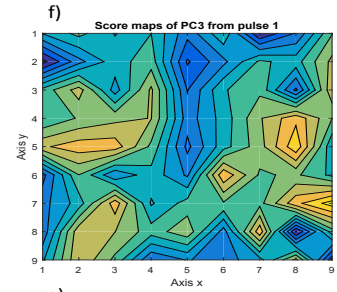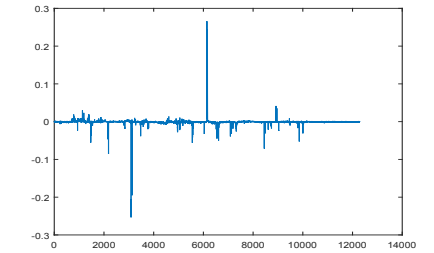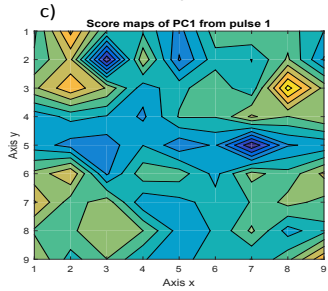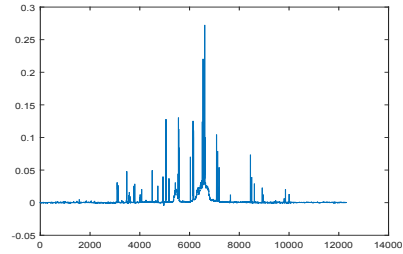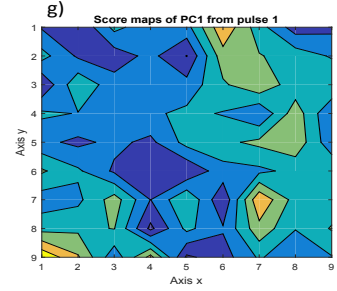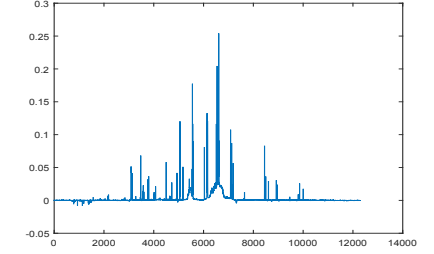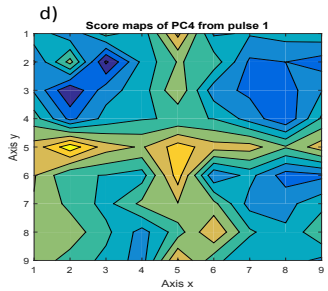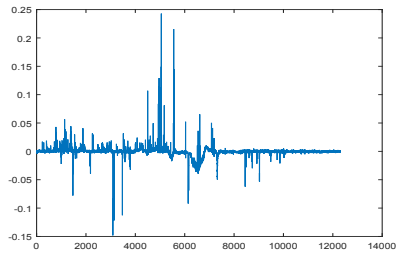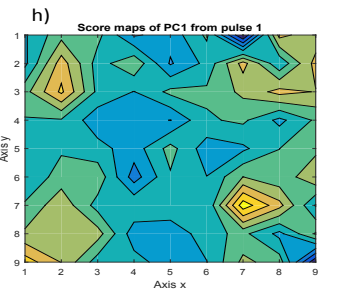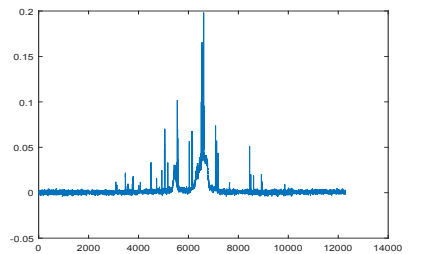

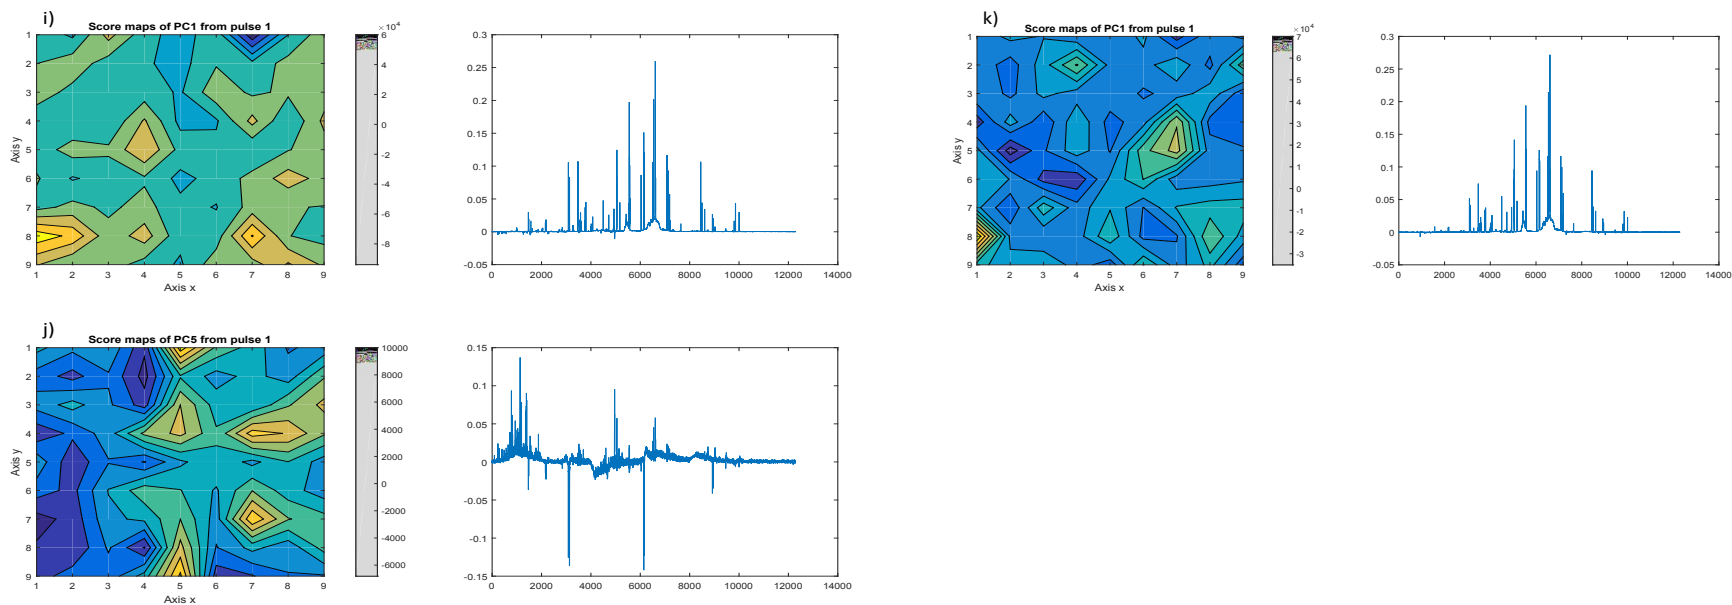

**Figure S1.** Hyperspectral maps obtained with the experimental runs of design 1 with the respective loading values. a)experimental run 1; b)experimental run 2; c)experimental run 3; d)experimental run 4; e)experimental run 5; f)experimental run 6; g)experimental run 7; h)experimental run 8; i)experimental run 9; j)experimental run 10; k)experimental run 11.

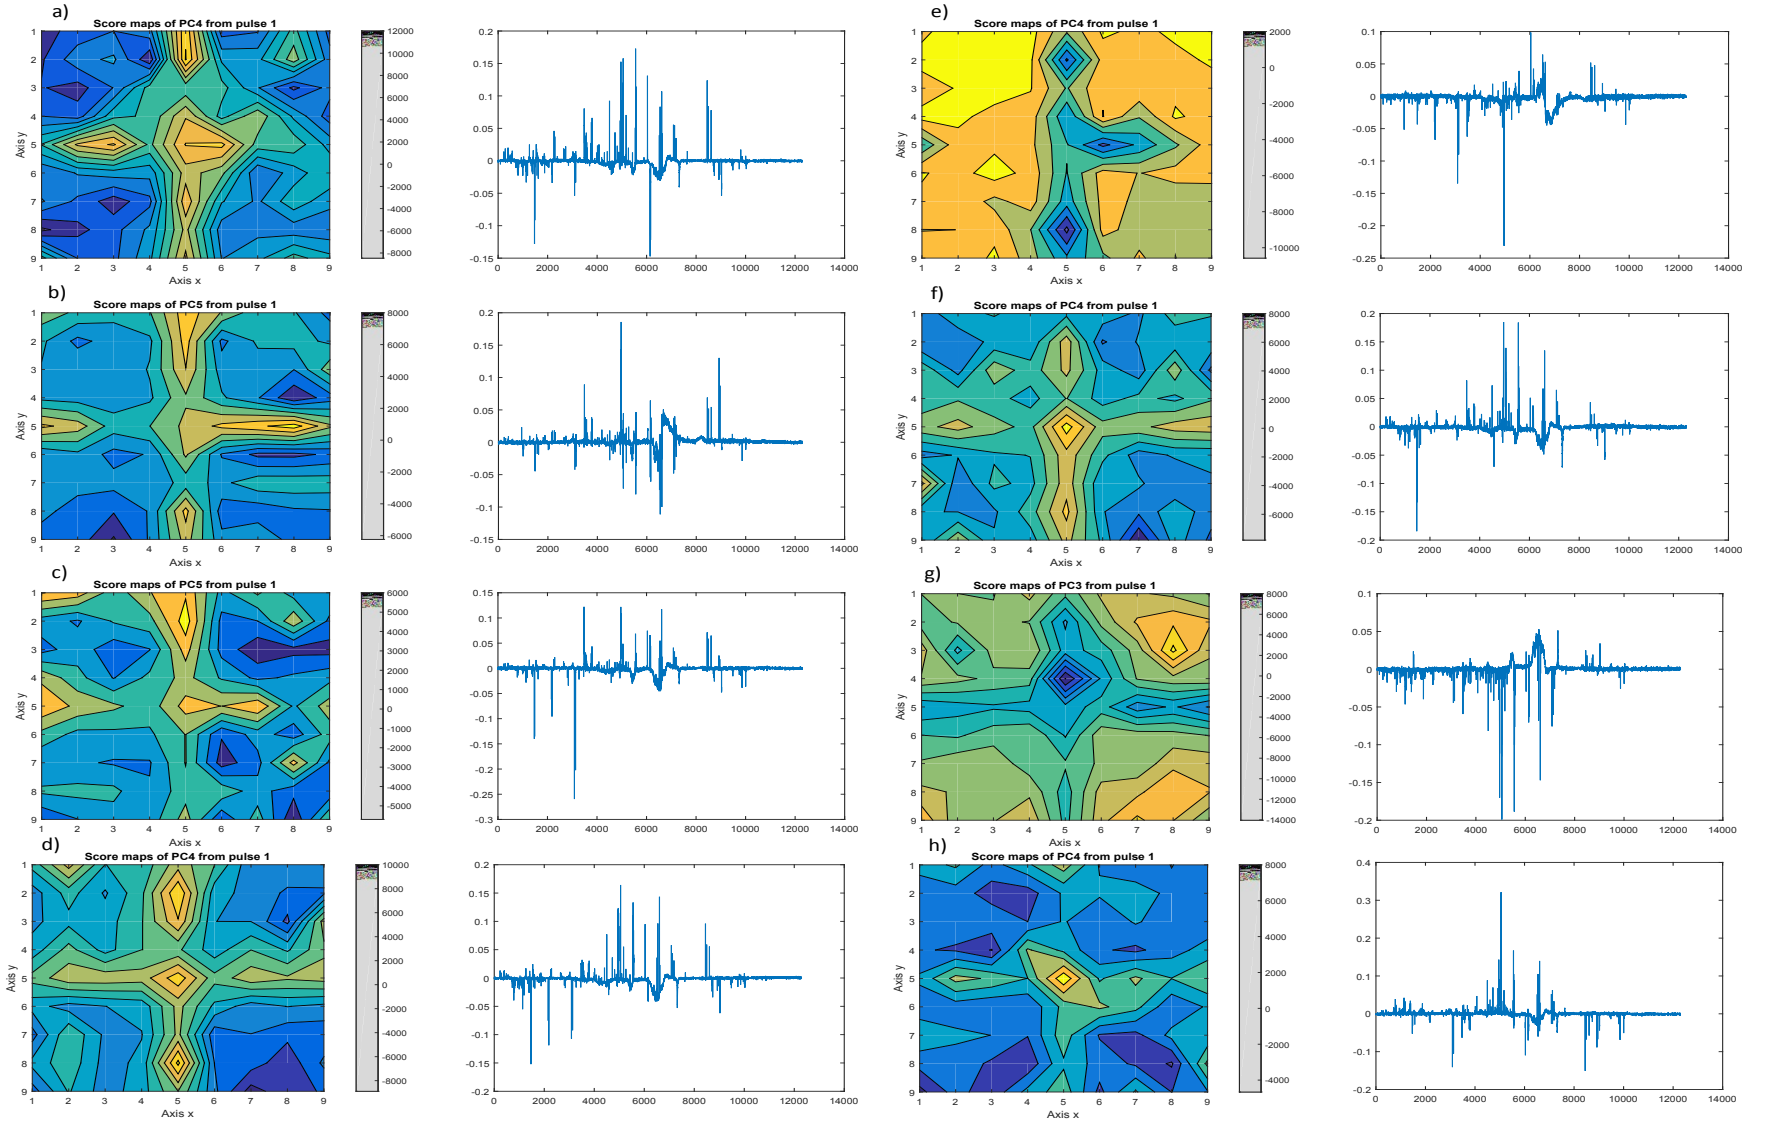

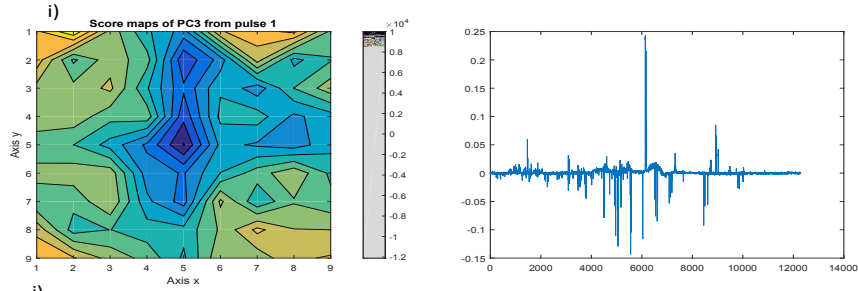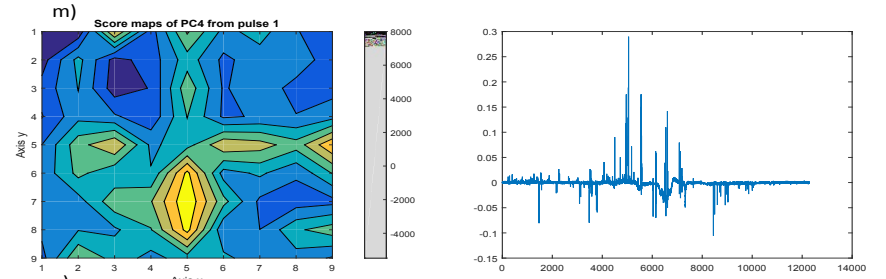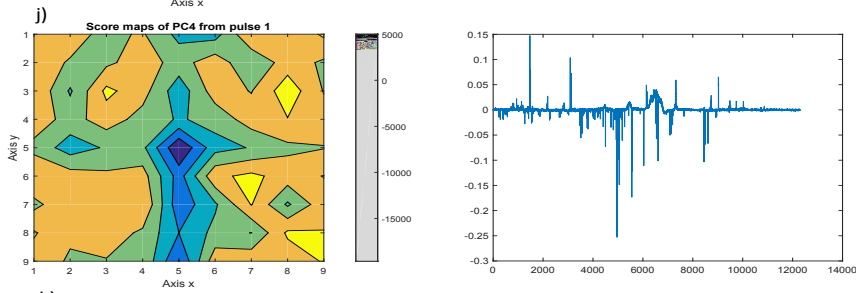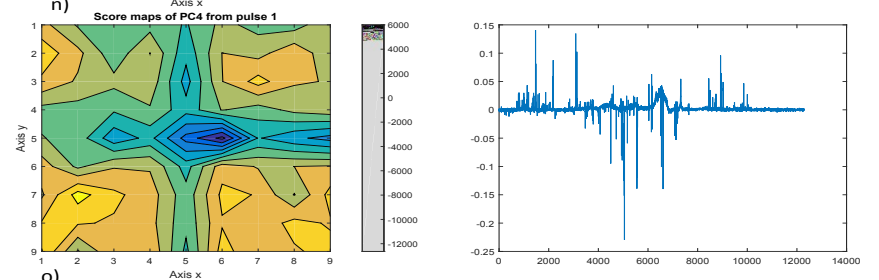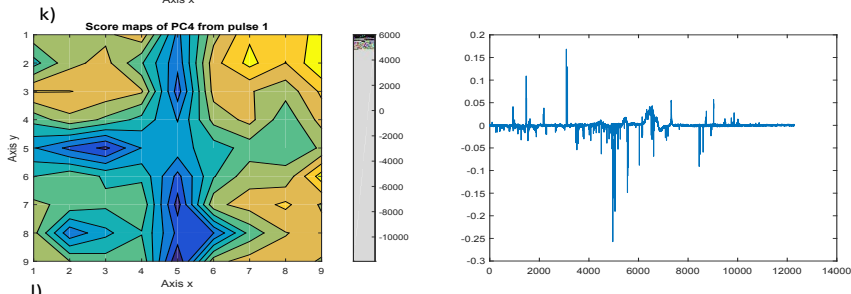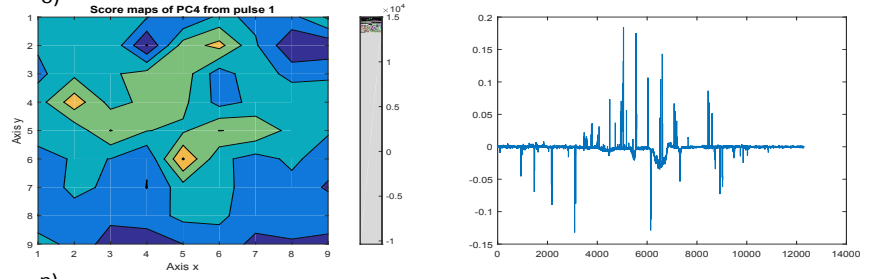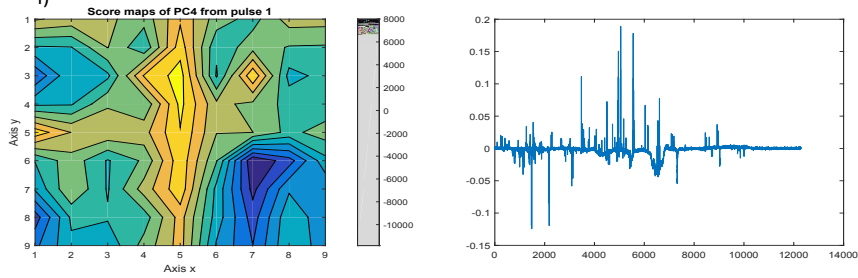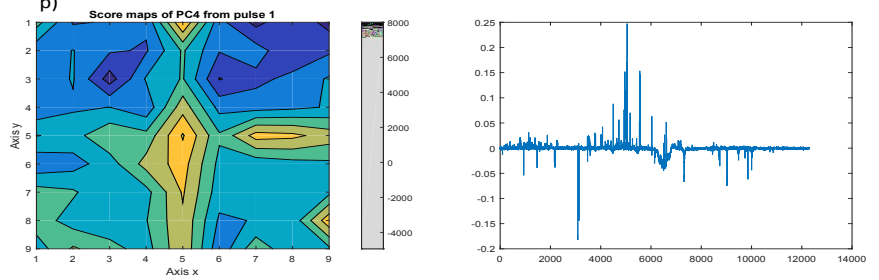

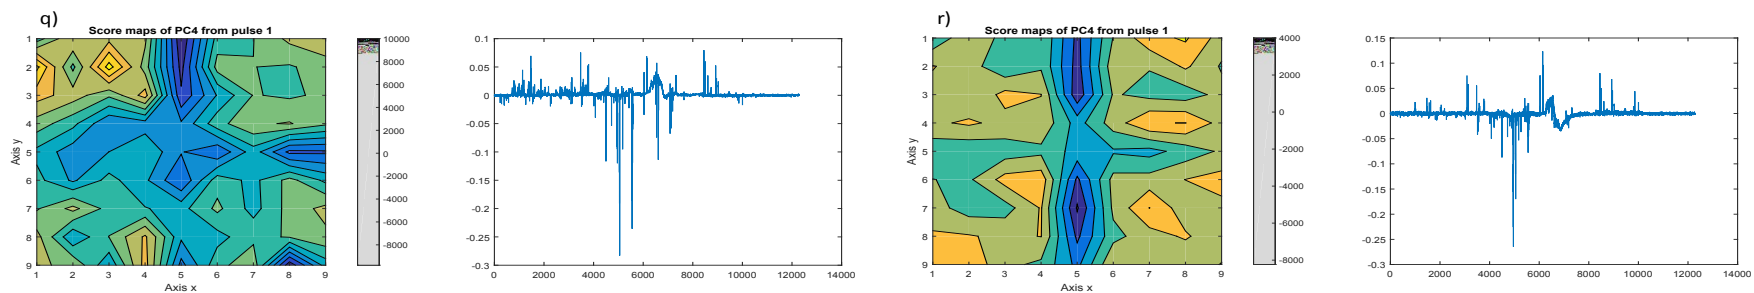

**Figure S2.** Hyperspectral maps obtained with the experimental runs of design 2 with the respective loading values. a)experimental run 1; b)experimental run 2; c)experimental run 3; d)experimental run 4; e)experimental run 5; f)experimental run 6; g)experimental run 7; h)experimental run 8; i)experimental run 9; j)experimental run 10; k)experimental run 11. l) experimental run 12; m) experimental run 13; n) experimental run 14; o) experimental run 15; p) experimental run 16; r) experimental run 17.



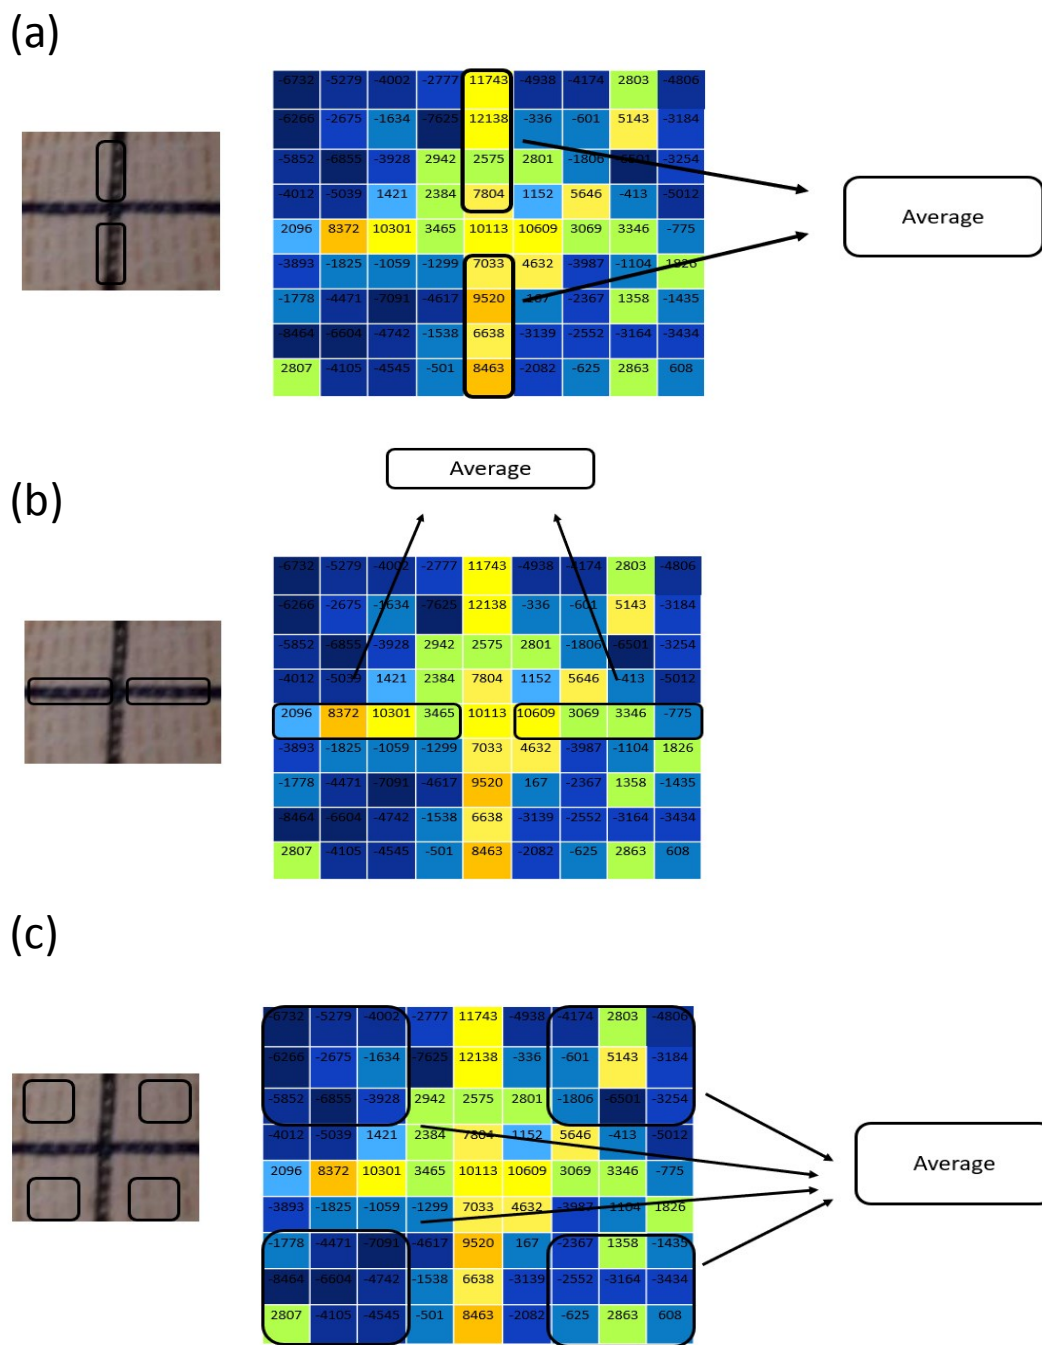

**Figure S3.** Pictorial description of the data acquisition strategy used in Design 2. a) average score value obtained for the black ink in experimental run 1. b) average score value obtained for the blue ink in experimental run 1. c) average score value obtained for the paper in experimental run 1.

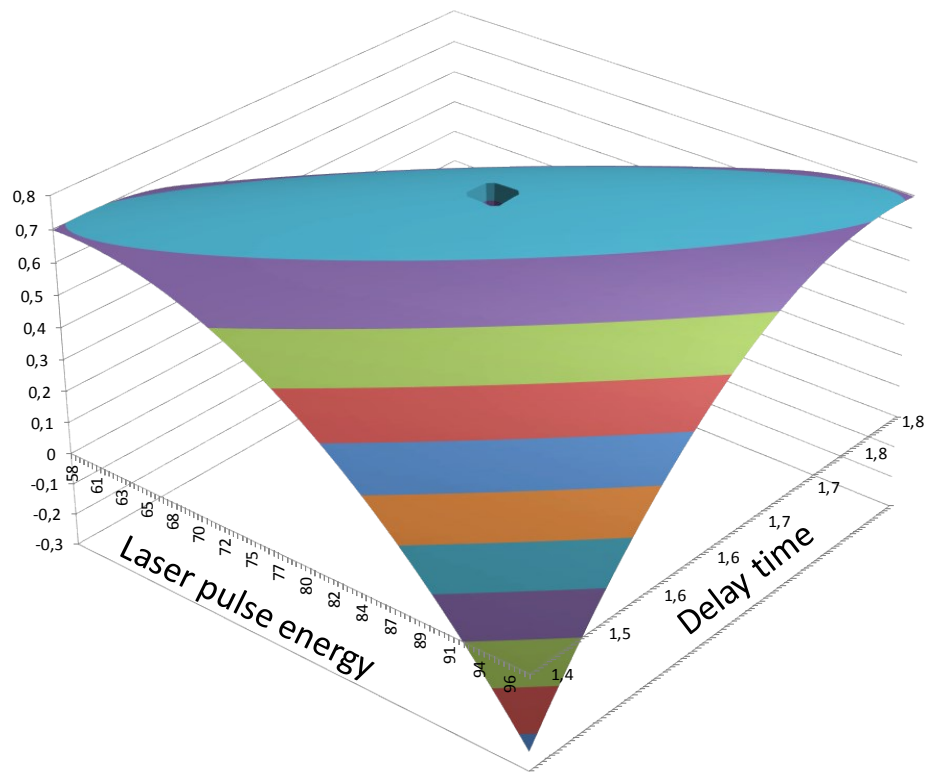

**Figure S4.** Response surface obtained with the regression model calculated. It is possible to notice that the max  $D_g$  is in delay time  $\sim 1.68$  and laser pulse energy  $\sim 78\text{mJ}$

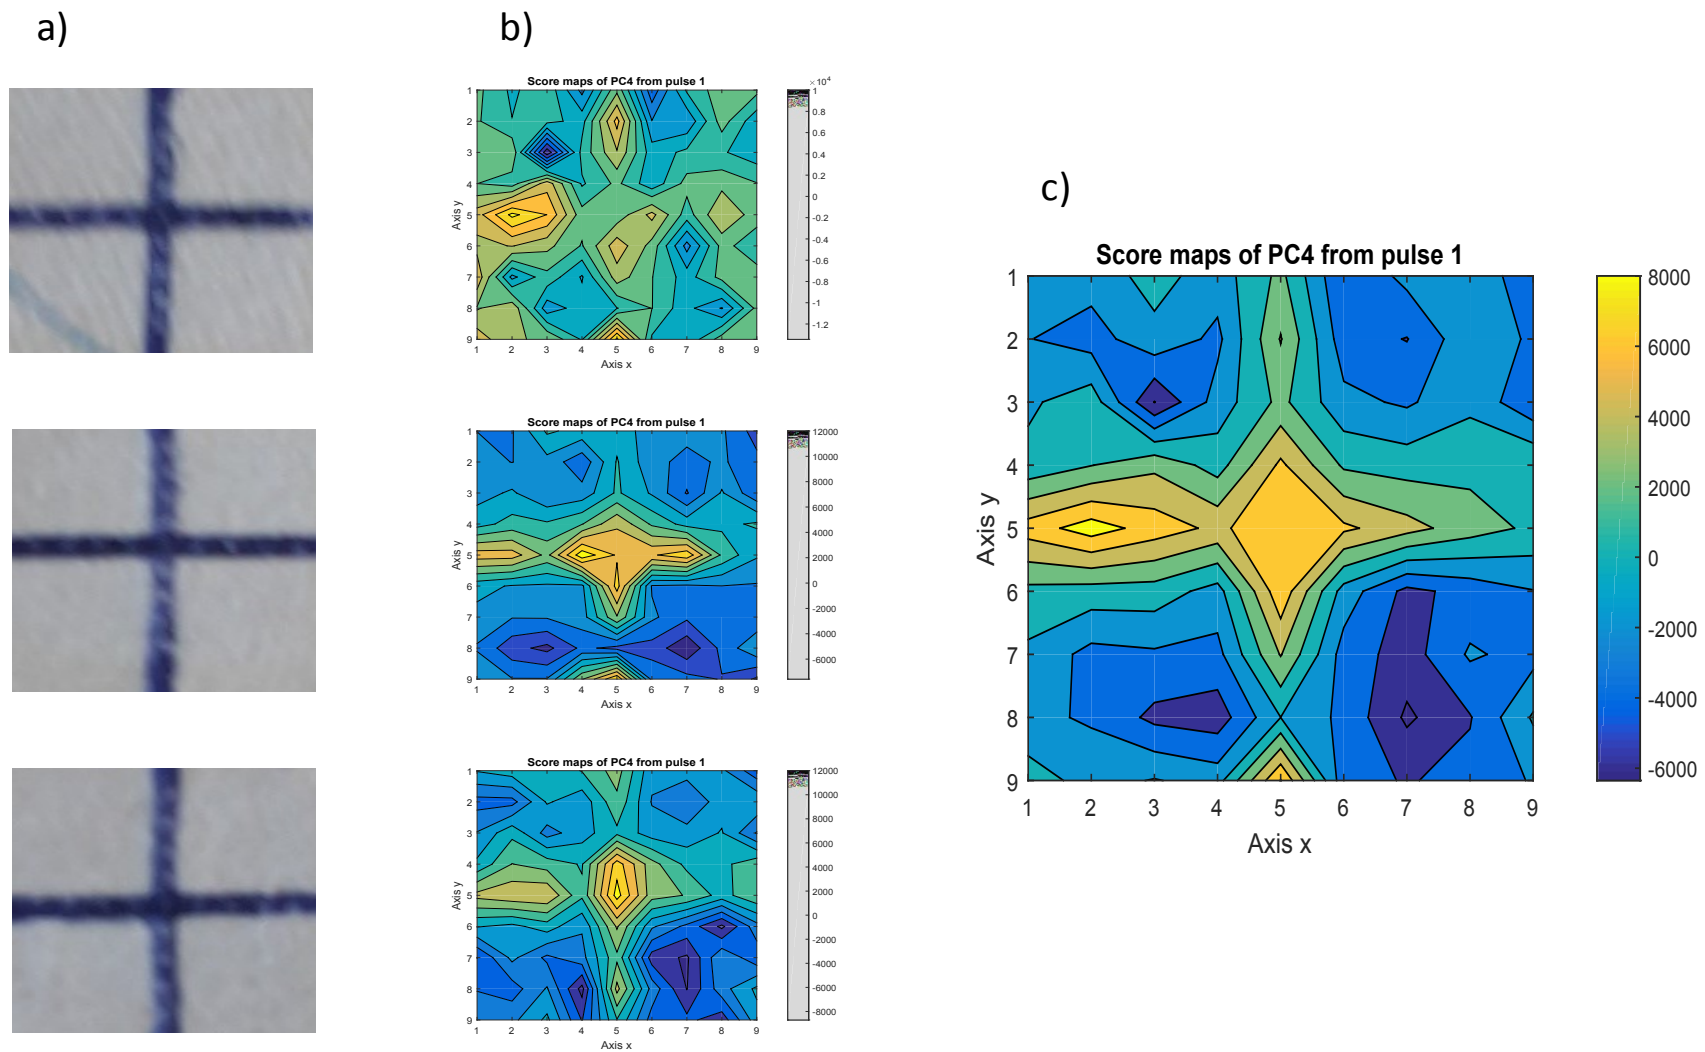

**Figure S5.** Results obtained for the same color pen test. a) samples; b) hyperspectral maps; c) hyperspectral map obtained with the average signal

a)

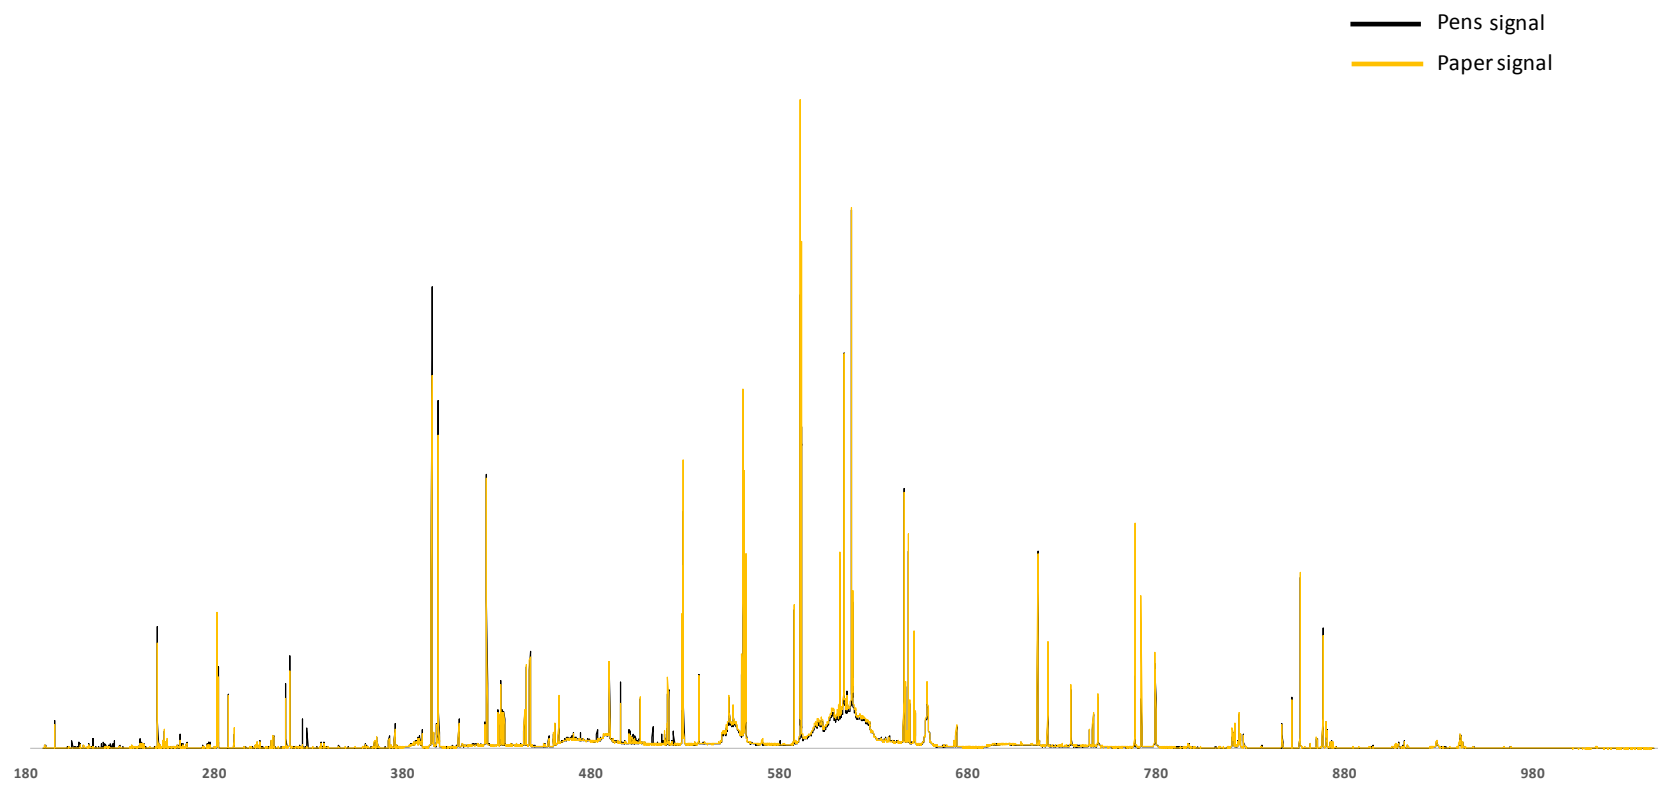

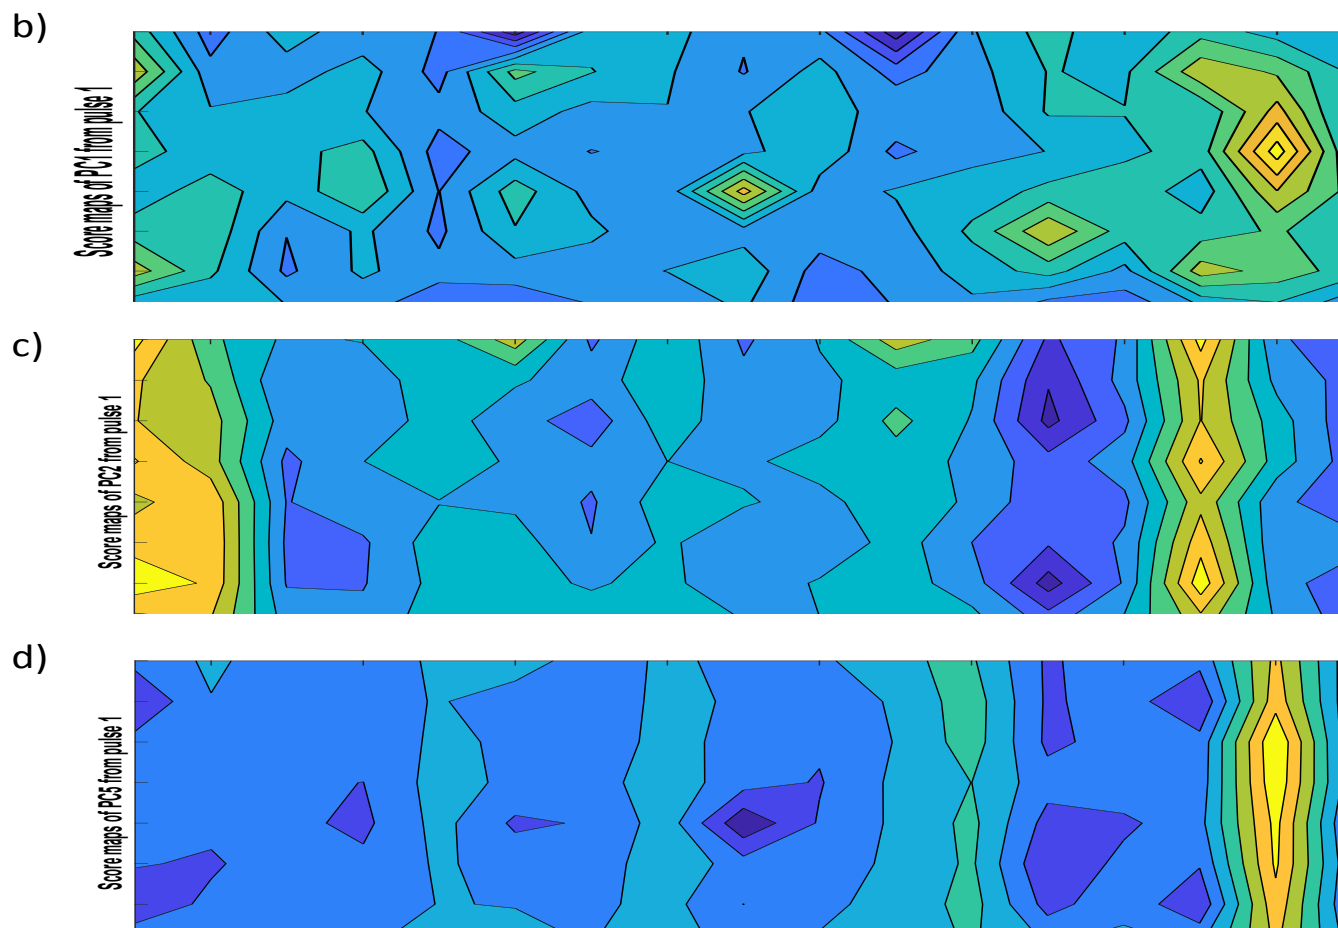

**Figure S6.** Results obtained for the tests made with all the 16 pens analyzed. a) average spectra obtained for the pens signal in black and for the paper signal in yellow; b) scores map obtained using all the 12288 emission lines for the PC1; c) scores map obtained using all the 12288 emission lines for the PC2; d) scores map obtained using all the 12288 emission lines for the PC5;

a)

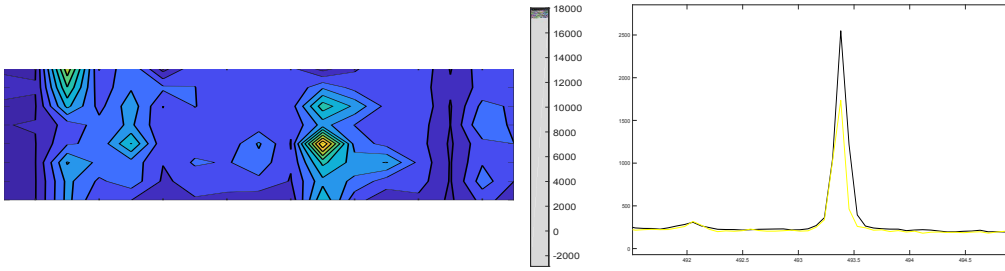

b)

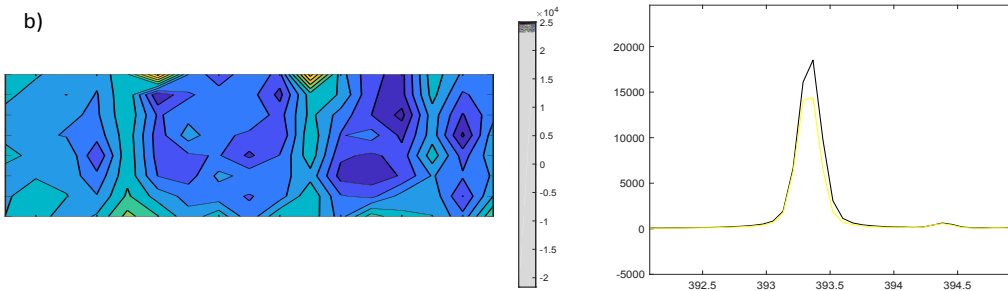

c)

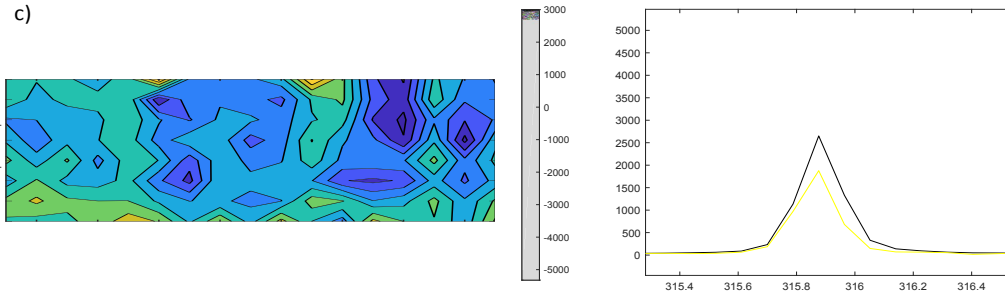

d)

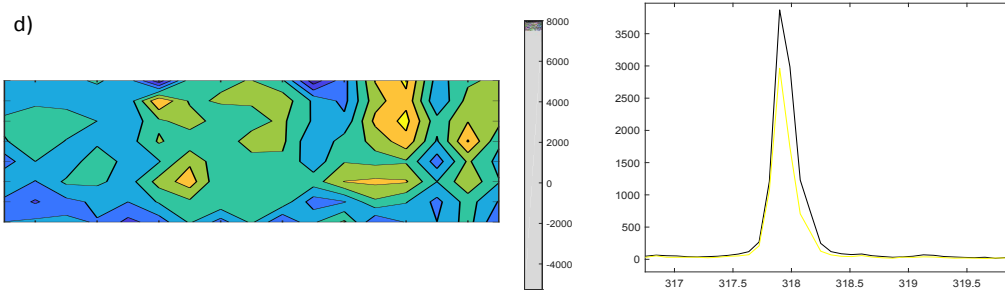

e)

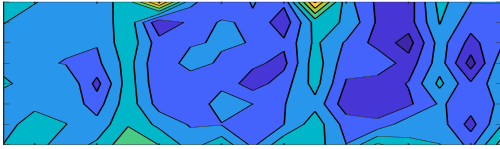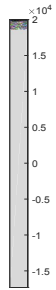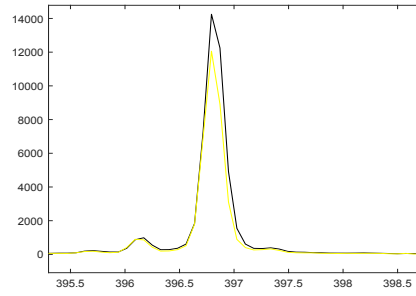

f)

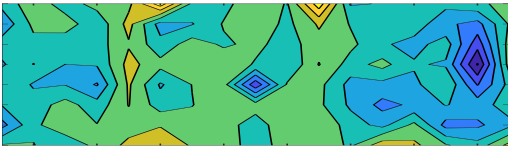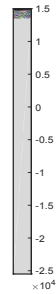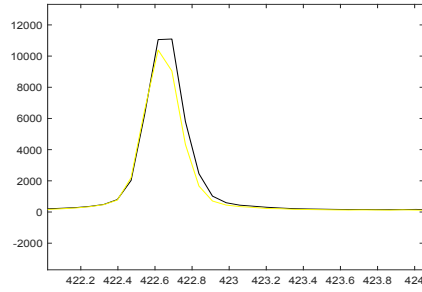

g)

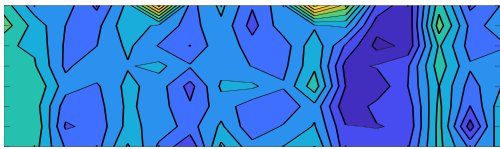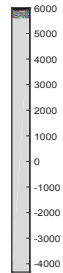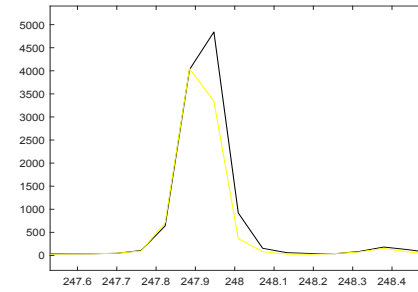

h)

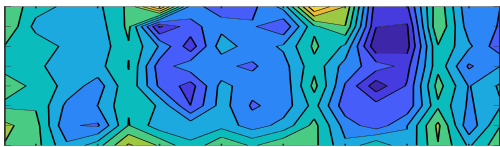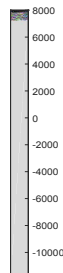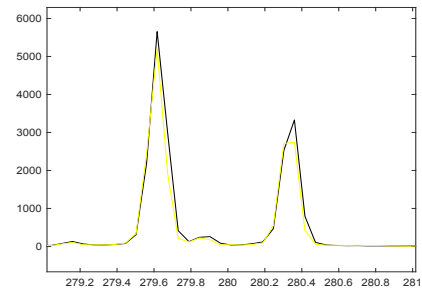

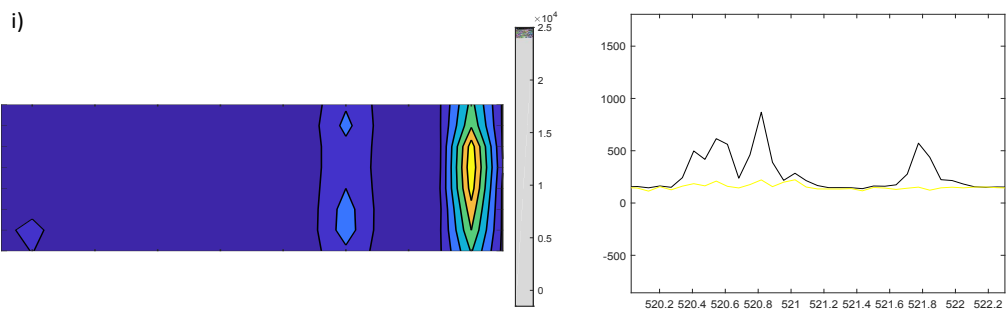

**Figure S7.**Score map obtained for all the pens in the left and the respective spectral range profile used in the right.



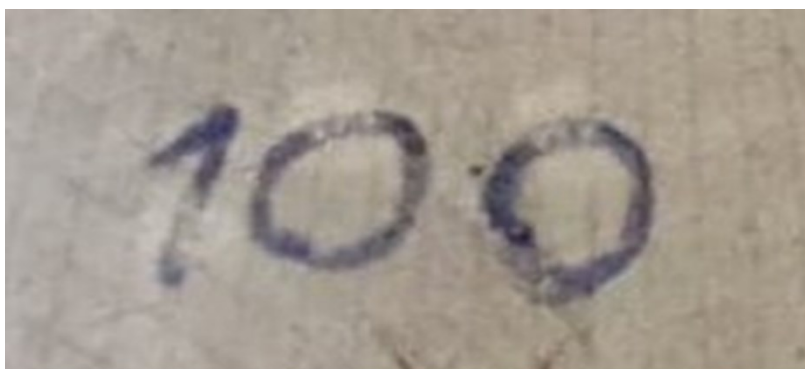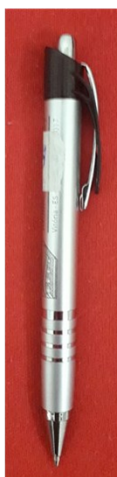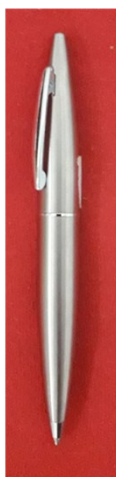

a10 ( $3566 \pm 2 \text{ mg kg}^{-1}$ )    a8 ( $291 \pm 2 \text{ mg kg}^{-1}$ )

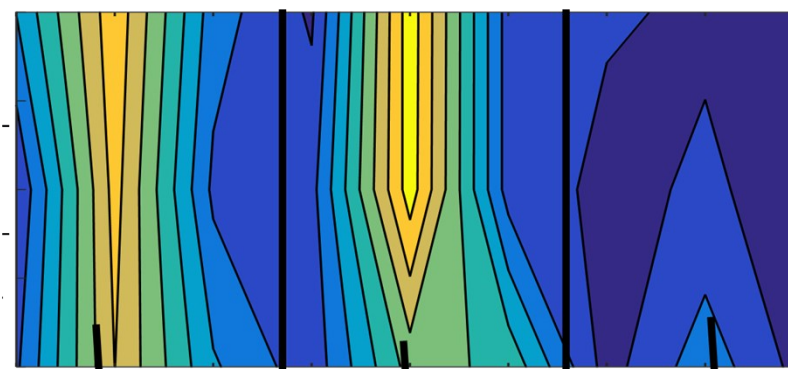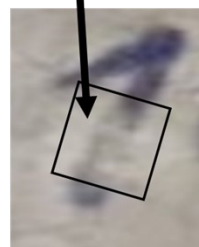

real

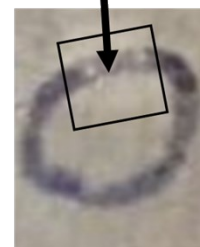

real

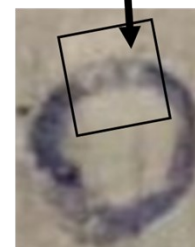

fake

Figure S8. Simulated test of a real situation.

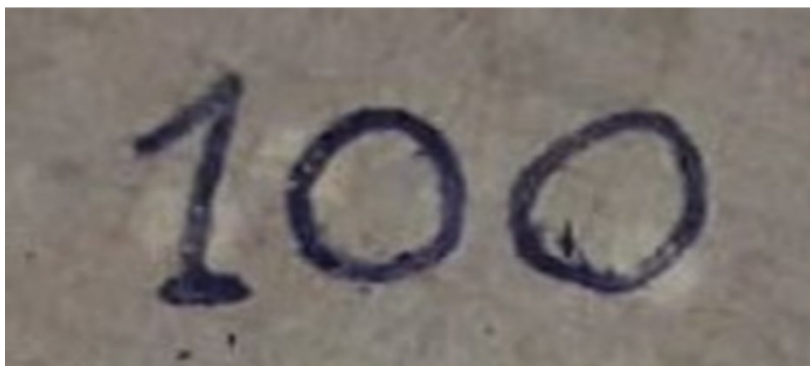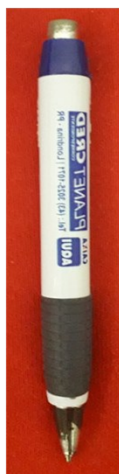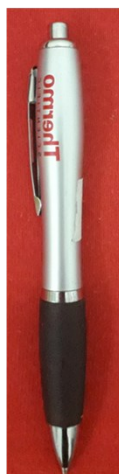

a3 ( $2839 \pm 8 \text{ mg kg}^{-1}$ ) a7 ( $2769 \pm 6 \text{ mg kg}^{-1}$ )

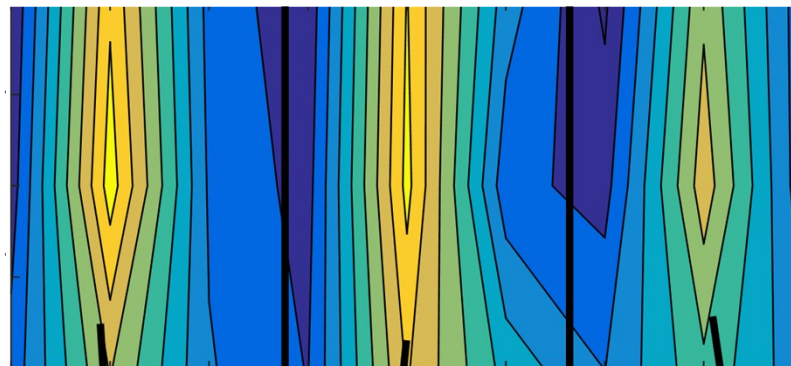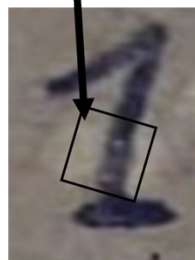

real

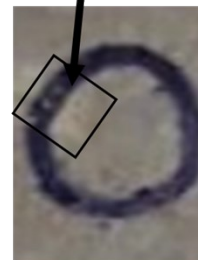

real

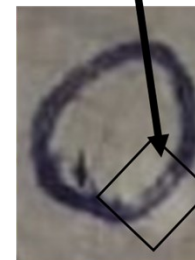

fake

Figure S9. Simulated test of a real situation.

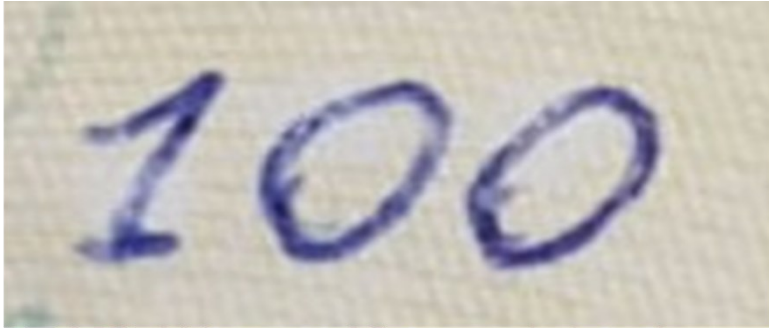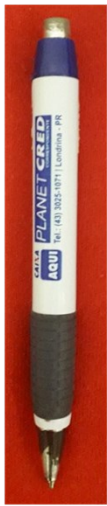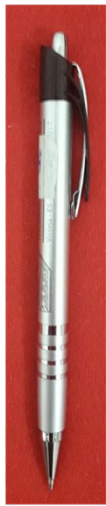

A3 ( $2839 \pm 8 \text{ mg kg}^{-1}$ )    a10 ( $3566 \pm 2 \text{ mg kg}^{-1}$ )

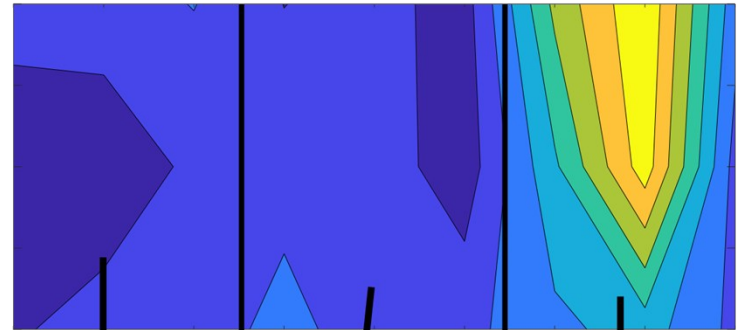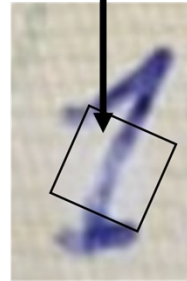

real

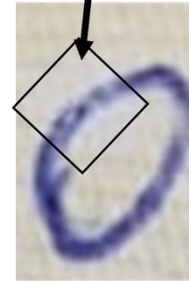

real

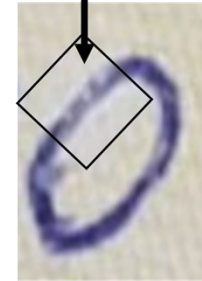

fake

Figure S10. Simulated test of a real situation.

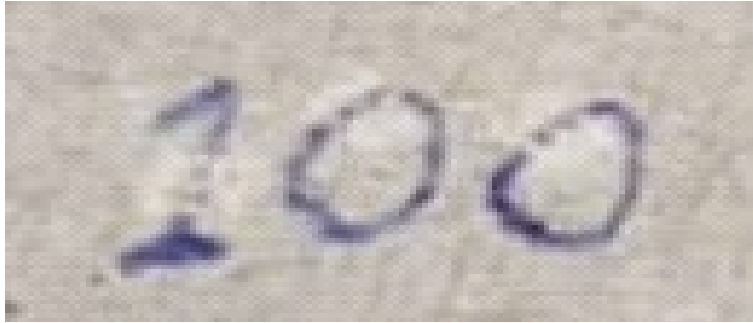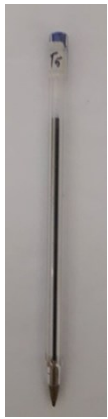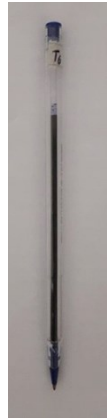

A3 ( $5744 \pm 27 \text{ mg kg}^{-1}$ ) a2 ( $\text{Cu} < \text{LoD}$ )

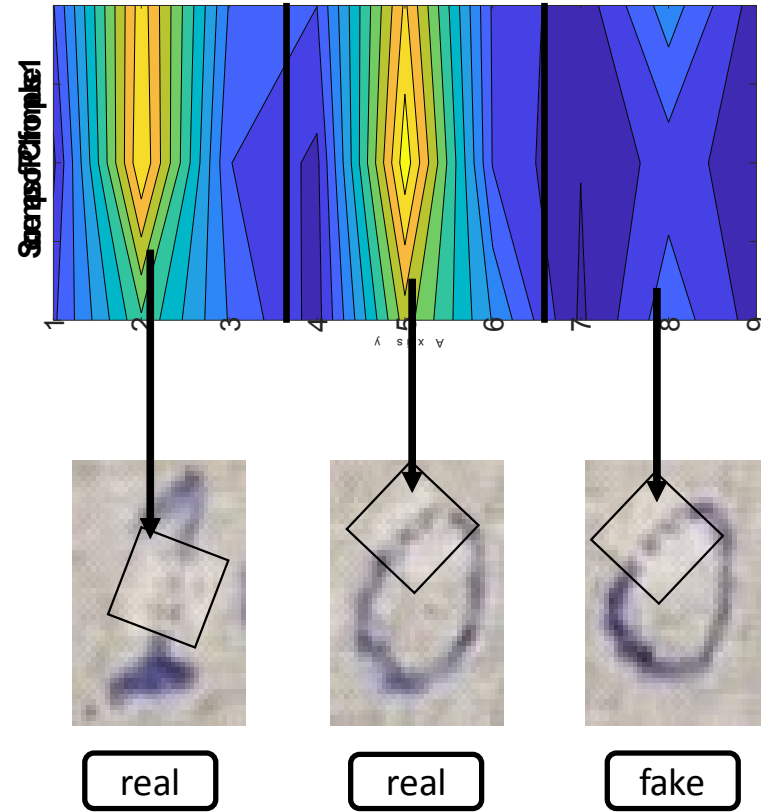

**Figure S11.** Simulated test of a real situation.
